# Supplementary material
Source: publisher figshare collection journal article supplement (https://osapublishing.figshare.com/ndownloader/files/8297780)
Supplement: Supplementary file 1 [file 8297780]

	Roughness	Thickness # 2	EMA % (TiO2)	Einf	UV Pole Amp.	UV Pole En.	IR Pole Amp.	Resistivity (Ohm�cm)	Scat. Time (fs)	Amp2	Br2	En2	Amp3	Br3	En3
Roughness	1	-0.535	-0.657	0.169	-0.109	-0.102	-0.375	-0.308	0.337	-0.077	-0.123	0.05	-0.356	0.247	-0.4
Thickness	-0.535	1	0.914	0.208	-0.159	-0.103	-0.496	-0.551	0.534	-0.289	-0.645	0.173	-0.518	0.588	-0.483
EMA % (TiO2)	-0.657	0.914	1	0.187	-0.168	-0.13	-0.358	-0.414	0.397	-0.238	-0.519	0.146	-0.379	0.452	-0.342
Einf	0.169	0.208	0.187	1	-0.992	-0.98	-0.38	-0.425	0.42	-0.164	-0.467	0.08	-0.42	0.433	-0.458
UV Pole Amp.	-0.109	-0.159	-0.168	-0.992	1	0.997	0.276	0.322	-0.317	0.121	0.377	-0.054	0.316	-0.334	0.354
UV Pole En.	-0.102	-0.103	-0.13	-0.98	0.997	1	0.215	0.26	-0.254	0.093	0.315	-0.037	0.254	-0.271	0.292
IR Pole Amp.	-0.375	-0.496	-0.358	-0.38	0.276	0.215	1	0.989	-0.992	0.315	0.929	-0.135	0.993	-0.978	0.983
Resistivity (Ohm�cm)	-0.308	-0.551	-0.414	-0.425	0.322	0.26	0.989	1	-0.999	0.401	0.966	-0.22	0.998	-0.997	0.99
Scat. Time (fs)	0.337	0.534	0.397	0.42	-0.317	-0.254	-0.992	-0.999	1	-0.4	-0.956	0.22	-1	0.993	-0.993
Amp2	-0.077	-0.289	-0.238	-0.164	0.121	0.093	0.315	0.401	-0.4	1	0.369	-0.981	0.397	-0.403	0.392
Br2	-0.123	-0.645	-0.519	-0.467	0.377	0.315	0.929	0.966	-0.956	0.369	1	-0.183	0.95	-0.983	0.941
En2	0.05	0.173	0.146	0.08	-0.054	-0.037	-0.135	-0.22	0.22	-0.981	-0.183	1	-0.219	0.219	-0.216
Amp3	-0.356	-0.518	-0.379	-0.42	0.316	0.254	0.993	0.998	-1	0.397	0.95	-0.219	1	-0.99	0.995
Br3	0.247	0.588	0.452	0.433	-0.334	-0.271	-0.978	-0.997	0.993	-0.403	-0.983	0.219	-0.99	1	-0.98
En3	-0.4	-0.483	-0.342	-0.458	0.354	0.292	0.983	0.99	-0.993	0.392	0.941	-0.216	0.995	-0.98	1
